# Supplementary material for: Comparison of the mRNA expression profile of B‐cell receptor components in normal CD5‐high B‐lymphocytes and chronic lymphocytic leukemia: a key role of ZAP70
Source: PubMed Central journal article supplement (PMC5727315; doi:10.1002/cam4.1257), 2017-11-10
Supplement: CAM4-6-2984-s001.pdf [file CAM4-6-2984-s001.pdf]

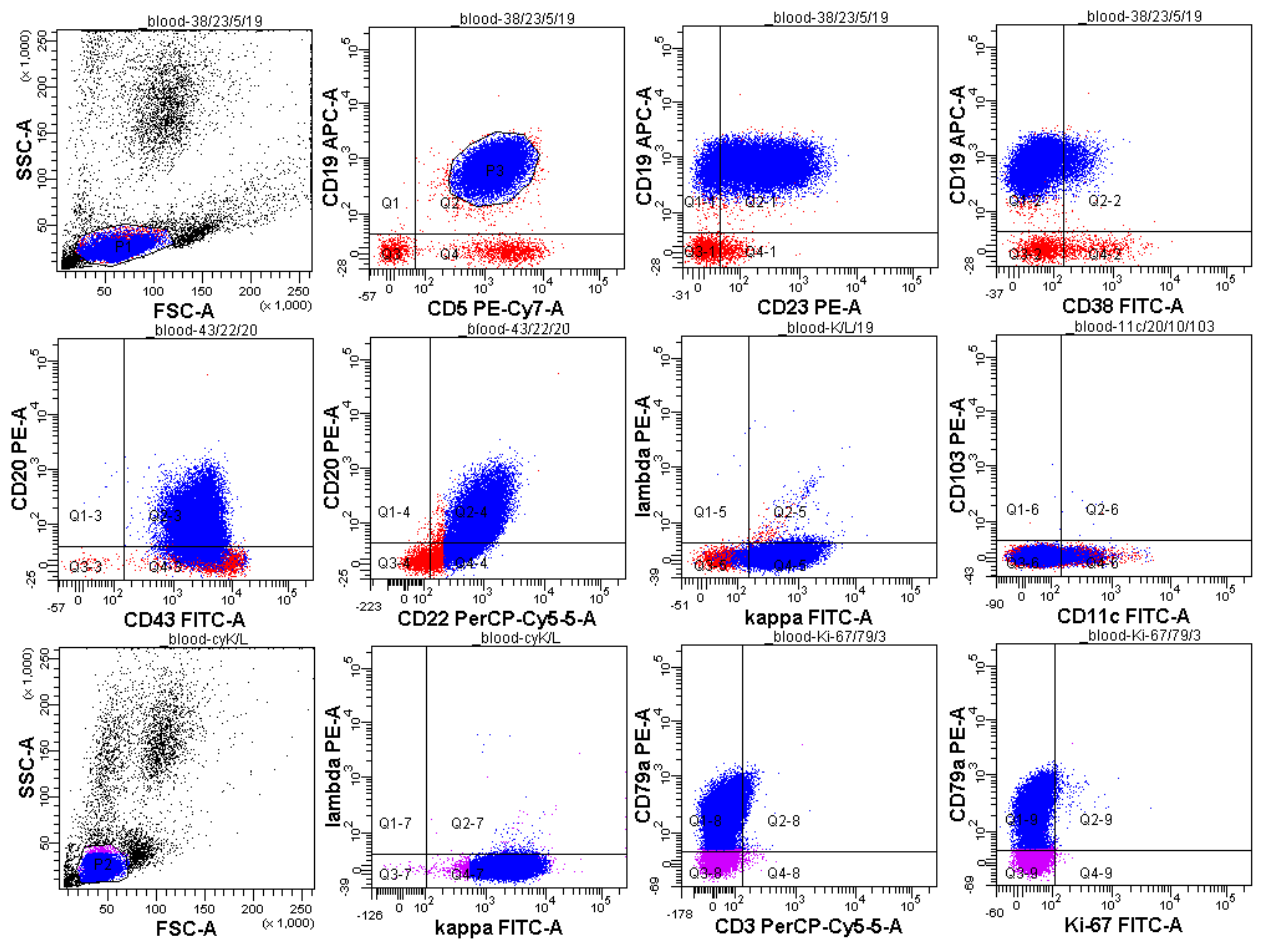

Figure S1. Immunophenotype of B-CLL cells. The upper and middle panels show extracellular staining, the lower panel shows intracellular staining. Lymphocytes are gated according to forward and side light scatter characteristics; the malignant population defined by CD19+CD5+ cell phenotype is highlighted in blue. Kappa clone is confirmed on both extra- and intracellular staining.

Table S1. B-CLL activation status based on surface CD38 expression.

| Unsorted B-CLL |                   |                  | Sorted B-CLL (>98% purity) |                   |
|----------------|-------------------|------------------|----------------------------|-------------------|
| No             | Activation status | % of lymphocytes | No                         | Activation status |
| 1              | CD38 low          | 64               | 1                          | CD38 low          |
| 2              | CD38 low          | 14               | 2                          | CD38 low          |
| 3              | CD38 low          | 63               | 3                          | CD38 low          |
| 4              | CD38 low          | 71               | 4                          | CD38 low          |

|    |                |    |    |                |
|----|----------------|----|----|----------------|
| 5  | CD38 low       | 94 | 5  | CD38 low       |
| 6  | CD38 low       | 45 | 6  | CD38 low       |
| 7  | CD38 low       | 62 | 7  | CD38 low       |
| 8  | CD38 low       | 53 | 8  | CD38 low       |
| 9  | CD38 low       | 84 | 9  | CD38 low       |
| 10 | CD38 low       | 33 | 10 | CD38 low       |
| 11 | CD38 low       | 56 | 11 | CD38 low       |
| 12 | CD38 low       | 68 | 12 | CD38 low       |
| 13 | CD38 low       | 44 | 13 | CD38 low       |
| 14 | CD38 low       | 38 | 14 | CD38 low       |
| 15 | CD38 low       | 32 | 15 | CD38 low (med) |
| 16 | CD38 low       | 90 | 16 | CD38 low (med) |
| 17 | CD38 low       | 56 | 17 | CD38 low (med) |
| 18 | CD38 low       | 50 | 18 | CD38 low (med) |
| 19 | CD38 low       | 65 | 19 | CD38 high+     |
| 20 | CD38 low (med) | 64 | 20 | CD38 high+     |
| 21 | CD38 high+     | 85 |    |                |
| 22 | CD38 high+     | 30 |    |                |
| 23 | CD38 high+     | 95 |    |                |
| 24 | CD38 high+     | 92 |    |                |
| 25 | CD38 high+     | 96 |    |                |
| 26 | CD38 high+     | 63 |    |                |

Table S2. Primer sequences used in the study

| Gene         | sense                                  | antisense                           |
|--------------|----------------------------------------|-------------------------------------|
| <i>UBC</i>   | 5'-ATT TGG GTC GCG GTT CTT G-3'        | 5'-TGC CTT GAC ATT CTC GAT GGT-3    |
| <i>HPRT1</i> | 5'-TGA CAC TGG CAA AAC AAT GCA-3'      | 5'- GGT CCT TTT CAC CAG CAA GCT-3'  |
| <i>YWHAZ</i> | 5'- ACT TTT GGT ACA TTG TGG CTT CAA-3' | 5'- CCG CCA GGA CAA ACC AGT AT-3'   |
| <i>LYN</i>   | 5'- TCC TGA AGA GCG ATG AAG GT-3'      | 5'- CTG CCT TTT CTT TCC AGC AC - 3' |

|              |                                         |                                         |
|--------------|-----------------------------------------|-----------------------------------------|
| <i>SYK</i>   | 5'- TTC GGA CTC TCC AAA GCA<br>CT - 3'  | 5'- TCA TCC CTC GAT ATG GCT TC<br>- 3'  |
| <i>ZAP70</i> | 5'- CCA GAG GAG CTC AAG GAC<br>A - 3'   | 5'- CCA CGT CGA TCT GCT TCT T -<br>3'   |
| <i>SHP1</i>  | 5' - CCT GGA GAC TTC GTG CTT<br>TC - 3' | 5' - TCG GAC TCC TGC TTC TTG<br>TT - 3' |
| <i>CD79A</i> | 5' - GGG CAA CGA GTC ATA CCA<br>- 3'    | 5' - AGC TTC TCG TTC TGC CAT -<br>3'    |
| <i>CD79B</i> | 5' - GTC ATG GGA TTC AGC ACC<br>TT - 3  | 5'- GCA GCG TCA CTA TGT CCT C<br>- 3'   |
